# Supplementary material
Source: PubMed Central journal article supplement (PMC6439676)
Supplement: jama-321-306-s002.pdf [file jama-321-306-s002.pdf]

## **Data Sharing Statement**

### **Data**

**Data available:** No

### **Additional Information**

**Explanation for why data not available:** Due to the industrial source of the data, these data will not be shared.
